# Supplementary material
Source: Preprints.org preprint supplement (doi:10.20944/preprints202103.0607.v1)
Supplement: Supplementary file 1 [file supplementary]

The new version (2020) of PRISMA reporting checklist for systematic reviews was used – currently in preprint form. An extension for scoping reviews is not yet available. Items not relevant for scoping reviews were labeled with N/A.

Page, M. J., McKenzie, J., Bossuyt, P., Boutron, I., Hoffmann, T., mulrow, c. d., … Moher, D. (2020, September 14). The PRISMA 2020 statement: an updated guideline for reporting systematic reviews. https://doi.org/10.31222/osf.io/v7gm2

| Item No. | Page No. |
| --- | --- |
| 1 | 1 |
| 2 | 1-2 |
| 3 | 2-3 |
| 4 | 3 |
| 5 | 3 |
| 6 | 4 |
| 7 | Appendix 2 (all) |
| 8 | 4 |
| 9 | 4-5 |
| 10a | N/A |
| 10b | 4-5 |
| 11 | N/A |
| 12 | N/A |
| 13a | N/A |
| 13b | N/A |
| 13c | N/A |
| 13d | N/A |
| 13e | N/A |
| 13f | N/A |
| 14 | N/A |
| 15 | N/A |
| 16a | 6 |
| 16b | 6 |
| 17 | 6, Appendix 3 |
| 18 | N/A |
| 19 | Appendix 3 |
| 20a | N/A |
| 20b | N/A |
| 20c | N/A |
| 20d | N/A |
| 21 | N/A |
| 22 | N/A |
| 23a | 11-12 |
| 23b | 13-14 |
| 23c | 13-14 |
| 23d | 13 |
| 24a | 4 |
| 24b | 4 |
| 24c | 4 |
| 25 | 14 |
| 26 | 14 |
| 27 | Appendices |
