# Supplementary material
Source: Preprints.org preprint supplement (doi:10.20944/preprints202103.0607.v1)
Supplement: Supplementary file 2 [file Appendix B Search strategies, sources and results.docx]

| **Databases** |  | **Number of duplicates** | **Fulltext screening** | **Included in scoping review** |
| --- | --- | --- | --- | --- |
| **Scopus** | **8** | **14** | **15** | **8** |
| **Web of Science** | **5** |
| **CINAHL** | **5** |
| **Medline** | **2** |
| **ProQuest** | **93** |
| **PubMed** | **4** |
| **EMBASE** | **4** |
| **PsycINFO** | **0** |
| **Cochrane** | **3** |
| **DART** | **0** |
| **Open Access** | **16** |
| **Open Gr** | **0** |
| **Electronic Theses Online Service** | **0** |
| **Clinical trials & Current Controlled trials** | **0** |
| **Google Scholar** | **58** |
|  | **198** | **14** | **15** | **8** |
|  |  |  |  |  |
| **Manual search** |  |  |  |  |
| **Journals** | **11** | **4** | **7** | **0** |
| **Websites (adaptation articles)** | **-** | **-** | **3** | **2** |
| **Reference lists of included texts and 1 scoping review reference list** | **-** | **-** | **-** | **0** |
|  |  |  |  | **2** |
| **Total** |  |  |  | **10** |

| **Journals searched manually, November 2020**  **Results: 11 (after screening title/abstract)**  **All results were duplicates or irrelevant** |
| --- |
| Journal of music therapy |
| Nordic journal of music therapy |
| Music therapy perspectives |
| Voices |
| Approaches: An Interdisciplinary Journal of Music Therapy |
| Canadian music therapy journal |
| The New Zeland Journal of Music Therapy |
| Australian Journal of Music Therapy |
| Arts in Psychotherapy |
| Oxford University Press |
| La Revue française de Musicothérapie |
| MUSIQUE – THÉRAPIE – COMMUNICATION |
| REVUE DE MUSICOTHÉRAPIE |
| Musiktherapeutische Umschau (MU) |
| Musik und Gesundsein |
| Journal of Arts Therapies (JAT) |
| Quaderni italiani di Musicoterapia |
| <https://mmd.iammonline.com/index.php/musmed/article/view/795> |
| Japanese Journal of Music Therapy |

| **Websites of MT associations searched, November 2020** | |
| --- | --- |
| USA | [musictherapy.org](http://therapy.org/) |
| UK | [bamt.org](http://bamt.com/) |
| Europe | [emtc-eu.com](http://emtc-eu.com) |
| Switzerland | [Musictherapy.ch](http://musictherapy.ch/) |
| Germany | [Musiktherapie.de](http://musiktherapie.de/) |
| New Zealand | [Musictherapy.org](http://musictherapy.org/).nz |
| World | WFMT |
| International | the International Association for Music & Medicine |
| Italy | <https://musicaterapia.it/> |
| Australia | Australian Musíc Therapy Association |
| Israel | YAHAT |
| Japan | Japanese |

**Scopus**

Date of search 25.10.2020, 7:42-8:13

Web of Science Core Collection

Date of search 25.10.2020, 17:33-17:56

**ProQuest Central**

Date of search 25.10.2020, 18:05-18:32

**PsycINFO/PsycARTICLES**

Date of search 25.10.2020, 19:21-19:40

**Ovid MEDLINE(R) 1946 to October 23, 2020**

Date of search 25.10.2020, 19:41-19:55

**CINAHL Plus with Full Text**

Date of search 25.10.2020, 19:57-20:18

**EMBASE**

Date of search 25.10.2020, 20:19-20:36

**PubMed**

Date of search 25.10.2020, 20:37-20:53

**Cochrane Library**

## (covid OR coronavirus) AND (music therap*) AND (online OR virtual OR home-based OR remote OR telemedicine OR telehealth)

## Results: 3

## <https://clinicaltrials.gov/ct2/show/NCT04537858> (dostupný z Clinical trial) == irrelevant

## <https://clinicaltrials.gov/ct2/show/NCT04329533> (dostupný z Clinical trial) == irrelevant

## <https://pubmed.ncbi.nlm.nih.gov/32665041/> (dostupný z PubMed) == duplicate

### **Open Access Theses and Dissertations**

## (covid OR coronavirus) AND (music therap*) AND (online OR virtual OR home-based OR remote OR telemedicine OR distanc* OR telehealth)

## Results: 16

**Google Scholar**

(covid OR coronavirus) AND (music therap*) AND (online OR virtual OR home-based OR remote OR telemedicine OR distanc* OR telehealth)

Results: 58
