# Supplementary material
Source: Preprints.org preprint supplement (doi:10.20944/preprints202103.0607.v1)
Supplement: Supplementary file 5 [file Appendix E Tips for music therapy activities.docx]

**Appendix 5**

**Tips for music therapy activities, resources and webinars related to the pandemic**

**(This list was prepared in November 2020.)**

| **Country/association/URL source** | **URL links to resources** |
| --- | --- |
| **New Zealand, https://www.musictherapy.org.nz/covid-19/** | The following from OTNZ-WNA links to a series of interactive workshops and the toolkit available to the public is at [www.otnz.co.nz](http://www.otnz.co.nz/)  <https://www.youtube.com/watch?v=mCqJclmha9g&feature=emb_title>  <https://www.youtube.com/watch?v=GZsdLXsH6Lg&feature=emb_logo>  <https://www.youtube.com/watch?v=xOC9sIOmqUI&feature=emb_logo> |
| **New Zealand,** [**https://www.nataliejack.com/telehealth**](https://www.nataliejack.com/telehealth) | Telehealth resources:  <https://www.crowdcast.io/e/xdqeg53b/register>  <https://www.crowdcast.io/e/rifeg3eh>  <https://www.crowdcast.io/e/telehealthupdates>  Webinar (and webinar notes) on sound quality for telehealth sessions  [https://www.youtube.com/watch?v=oDFkQpzqKD8&fbclid=IwAR2zAF9C4zMMr5SwXgaNfNXqmNdq2lLhoLjH_l1_I2W1i3DAHYZ-323AANs](https://www.youtube.com/watch?v=oDFkQpzqKD8&fbclid=IwAR2zAF9C4zMMr5SwXgaNfNXqmNdq2lLhoLjH_l1_I2W1i3DAHYZ-323AANs )  [https://ab7ba85a-9086-4bcf-aa80-ad88ebeb5154.filesusr.com/ugd/b3dde0_77f4620416da43958d6dbce0a6d7c53e.pdf](https://ab7ba85a-9086-4bcf-aa80-ad88ebeb5154.filesusr.com/ugd/b3dde0_77f4620416da43958d6dbce0a6d7c53e.pdf ) |
| **Blog** | Tips on telehealth  <https://www.su.edu/blog/2020/03/music-therapy-shifts-online-with-focus-on-telehealth/> |
| **UK, www.bamt.org** | Many resources  <https://www.bamt.org/resources/covid-19-useful-information> |
| **EMTC, www.emtc-eu.com** | Tips for remote sessions  <https://www.emtc-eu.com/news/2020/5/26/music-connects-us-the-use-of-music-and-the-role-of-music-therapy-during-a-pandemic-crisis-situation> |
| **Israel,** [**https://www.yahat.org/**](https://www.yahat.org/) | General info, tips and encouragement:  <https://www.yahat.org/news/news.aspx?newsId=91> |
| **BAMT Guidance for Music Therapists during the COVID-19 outbreak (pdf)** | *Apps and other online resources (with particular thanks to Irene LoCoco and Liz Coombes)*  *Available in AppStore or GooglePlay*  KORG has made the iKaossilator free for a limited time  Moog has made the Minimoog Model D Synthesiser free for a limited time  BandLab  Fingertip Maestro  NodeBeat  SoundForest  Blocs Wave  Bloom (paid) |
| **Chiltern Music therapy** | Digital MT services:  <https://www.chilternmusictherapy.co.uk/services/digital> |
| **BAMT, many resources** | Conducting online sessions, manuals, tips:  <https://www.bamt.org/resources/covid-19-useful-information/online-and-phone-therapy> |
| **USA, linked from AMTA** | Coronavirus Coping Kit for Music Therapy BusinesOwners <https://my.soundscapingsource.com/coronavirus> |
| **AMTA webinars** | A webinar with case reports  <https://www.youtube.com/watch?v=PJ8vwKF-zSA&feature=youtu.be> |
| **AMTA webinar** | Music Therapy & Telehealth - Sponsored by the AMTA COVID-19 Task Force  Learning Objectives:  - Learn how to choose the best telehealth platform for your practice  - Discuss differences and similarities for the music therapy process in telehealth vs. in person services  - Identify potential barriers for effective music therapy via telehealth and how to address them  - Identify ethical issues related to the delivery of music therapy via telehealth  <https://www.youtube.com/watch?v=YwSjNjf4IR4> |
